CORRECTION

# Correction: Abnormal CSF amyloid- $\beta$ 42 and tau levels in hip fracture patients without dementia

The *PLOS ONE* Staff

## Notice of republication

This article was republished on October 16, 2018 to correct for formatting errors in the Materials and methods, Results, and Discussion sections introduced during the typesetting process. The publisher apologizes for these errors. Please download this article again to view the correct version. The originally published, uncorrected article and the republished, corrected article are provided here for reference.

## Supporting information

**S1 File. Originally published, uncorrected article.**

(PDF)

**S2 File. Republished, corrected article.**

(PDF)

## Reference

1. Oh ES, Blennow K, Bigelow GE, Inouye SK, Marcantonio ER, Neufeld KJ, et al. (2018) Abnormal CSF amyloid- $\beta$ 42 and tau levels in hip fracture patients without dementia. *PLoS ONE* 13(9): e0204695. <https://doi.org/10.1371/journal.pone.0204695> PMID: [30252906](https://pubmed.ncbi.nlm.nih.gov/30252906/)

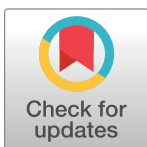

## OPEN ACCESS

**Citation:** The *PLOS ONE* Staff (2018) Correction: Abnormal CSF amyloid- $\beta$ 42 and tau levels in hip fracture patients without dementia. *PLoS ONE* 13(10): e0206719. <https://doi.org/10.1371/journal.pone.0206719>

**Published:** October 26, 2018

**Copyright:** © 2018 The PLOS ONE Staff. This is an open access article distributed under the terms of the [Creative Commons Attribution License](https://creativecommons.org/licenses/by/4.0/), which permits unrestricted use, distribution, and reproduction in any medium, provided the original author and source are credited.
